# Supplementary material for: From açaí (Euterpe oleracea Mart.) waste to mannose and mannanoligosaccharides: a one-step process for recalcitrant mannan depolymerization using dilute oxalic acid
Source: Royal Society of Chemistry journal article supplement (doi:10.1039/d4gc03732d), 2024-01-01
Supplement: d4gc03732d1.pdf [file d4gc03732d1.pdf]

## Supplementary material for:

### **From açai (*Euterpe oleracea* Mart.) waste to mannose and mannanoligosaccharides: a one-step process for recalcitrant mannan depolymerization using dilute oxalic acid**

Fernanda Thimoteo Azevedo Jorge<sup>1</sup>, Ingrid Santos Miguez<sup>1,2</sup>, George Victor Brigagão<sup>3</sup>,  
Ayla Sant'Ana da Silva<sup>1,2\*</sup>

<sup>1</sup> Laboratório de Biocatálise, Instituto Nacional de Tecnologia, Ministério da Ciência, Tecnologia e Inovações, Rio de Janeiro, 20081-312, RJ, Brazil

<sup>2</sup> Departamento de Bioquímica, Universidade Federal do Rio de Janeiro, Rio de Janeiro, 21941-909, RJ, Brazil

<sup>3</sup> Departamento de Engenharia Industrial, Escola Politécnica, Universidade Federal do Rio de Janeiro, Rio de Janeiro, 21941-909, RJ, Brazil

\*Corresponding author: [ayla.santana@int.gov.br](mailto:ayla.santana@int.gov.br)

## Table of contents

|                                                                                                                                                                                                                                                                                         |    |
|-----------------------------------------------------------------------------------------------------------------------------------------------------------------------------------------------------------------------------------------------------------------------------------------|----|
| Table S1. Açai seeds chemical composition .....                                                                                                                                                                                                                                         | 2  |
| Table S2. Premises and parameters for the biomass handling process section (S-100).....                                                                                                                                                                                                 | 2  |
| Table S3. Operational parameters for the polyphenols extraction process section (S-200).....                                                                                                                                                                                            | 3  |
| Table S4. Operational parameters for the acid hydrolysis process section (S-300).....                                                                                                                                                                                                   | 4  |
| Table S5. Operational parameters for the mannose purification section (S-500) .....                                                                                                                                                                                                     | 5  |
| Table S6. Operational parameters for the MOS purification section (S-600).....                                                                                                                                                                                                          | 6  |
| Table S7. Operational parameters for the combustion section (S-700) .....                                                                                                                                                                                                               | 6  |
| Table S8. Operational parameters for the cold utilities section (S-800) .....                                                                                                                                                                                                           | 7  |
| Table S9. Analysis of variance of the adjusted models for mannose yield, mannan conversion, and mass loss for oxalic acid hydrolysis of açai seeds.....                                                                                                                                 | 8  |
| Figure S1. Theoretical and experimental pH values of oxalic acid solutions at different concentrations and experimental pH values of açai seeds hydrolysates after dilute oxalic acid hydrolysis. Theoretical pH values for sulfuric acid solutions are also shown for comparison. .... | 10 |
| Figure S2. Correlations between the combined severity factor and response variables of dilute-oxalic acid hydrolysis of açai seeds optimization: a) mannose yield, b) mannan conversion, c) mass loss.....                                                                              | 11 |

## 1. Parameters for techno-economic analysis

Table S1. Açai seeds chemical composition

| Component        | Ref <sup>1</sup> | Ref <sup>2</sup> -<br>lot 1 | Ref <sup>2</sup> -<br>lot 2 | This<br>study | Average      | Normalized<br>average <sup>a</sup> |
|------------------|------------------|-----------------------------|-----------------------------|---------------|--------------|------------------------------------|
| Mannan           | 48.24%           | 47.09%                      | 52.46%                      | 50.55%        | 49.58%       | 53.89%                             |
| ARS <sup>b</sup> | 17.30%           | 18.34%                      | 19.54%                      | 20.85%        | 19.01%       | 20.66%                             |
| Extractives      | 9.50%            | 15.45%                      | 9.89%                       | 11.81%        | 11.66%       | 12.68%                             |
| Glucan           | 7.79%            | 6.09%                       | 8.40%                       | 5.77%         | 7.01%        | 7.62%                              |
| Xylan            | 2.80%            | 1.83%                       | 2.05%                       | 1.84%         | 2.13%        | 2.32%                              |
| Galactan         | 1.29%            | 1.79%                       | 1.51%                       | 1.31%         | 1.47%        | 1.60%                              |
| Ashes            | 0.16%            | 0.61%                       | 0.44%                       | 1.56%         | 0.69%        | 0.75%                              |
| Arabinan         | 0.61%            | 0.40%                       | 0.63%                       | 0.00%         | 0.41%        | 0.44%                              |
| <b>Sum</b>       | <b>87.7%</b>     | <b>91.6%</b>                | <b>94.9%</b>                | <b>93.7%</b>  | <b>92.0%</b> | <b>100.0%</b>                      |

<sup>a</sup> Values used for process simulations

<sup>b</sup> Acid resistant solids, modelled as lignin

Table S2. Premises and parameters for the biomass handling process section (S-100)

| Equipment and parameters                    | Values             |
|---------------------------------------------|--------------------|
| <b>Storage silo</b>                         |                    |
| Biomass bulk density (kg/m <sup>3</sup> )   | 738 <sup>3,4</sup> |
| Storage time (days)                         | 1                  |
| <b>Rotary Dryer</b>                         |                    |
| Incoming moisture content                   | 45% <sup>5</sup>   |
| Final moisture content                      | 10%                |
| Drying capacity (kg/m <sup>2</sup> h)       | 30 <sup>6</sup>    |
| <b>Mill and storage silo</b>                |                    |
| Mill energy consumption (kWh/t)             | 21 <sup>7</sup>    |
| Milled biomass density (kg/m <sup>3</sup> ) | 518                |
| Storage time (days)                         | 3                  |

Table S3. Operational parameters for the polyphenols extraction process section (S-200)

| <b>Equipment and parameters</b>                   | <b>Values</b>           |
|---------------------------------------------------|-------------------------|
| <b>Extractor</b>                                  |                         |
| Total solids (%wt)                                | 14%                     |
| Ethanol concentration (%wt)                       | 50%                     |
| Temperature (°C)                                  | 60                      |
| Residence time (min)                              | 30                      |
| Extraction efficiency                             | 95%                     |
| <b>Desolventizer</b>                              |                         |
| Ethanol recovery                                  | 99.99%                  |
| Inlet vapor temperature (°C)                      | 125                     |
| <b>Multi-effect Evaporator</b>                    |                         |
|                                                   | 1st / 2nd / 3rd effects |
| Temperature (°C)                                  | 85 / 75 / 60            |
| Pressure (atm)                                    | 1.061 / 0.557 / 0.201   |
| Heat transfer coefficients (kW/m <sup>2</sup> °C) | 2.98 / 2.56 / 1.85      |
| <b>Spray dryer</b>                                |                         |
| Final moisture content                            | 4%                      |
| Product recovery                                  | 90%                     |

Table S4. Operational parameters for the acid hydrolysis process section (S-300)

| <b>Equipment and parameters</b>                            | <b>Alternatives<br/>1&amp;1B</b> | <b>Alternative<br/>2</b> |
|------------------------------------------------------------|----------------------------------|--------------------------|
| <b>Vertical impregnation tank <sup>a</sup></b>             |                                  |                          |
| Total solids (wt%) <sup>8</sup>                            | 40%                              | 40%                      |
| Acid concentration (wt%)                                   | 6.0%                             | 4.0%                     |
| Temperature (°C)                                           | 177                              | 153                      |
| Pressure (atm)                                             | 8.95                             | 4.95                     |
| Residence time (min) <sup>8</sup>                          | 10                               | 10                       |
| <b>Horizontal reactor <sup>a</sup></b>                     |                                  |                          |
| <b>Operating conditions</b>                                |                                  |                          |
| Total solids (wt%) <sup>8</sup>                            | 30%                              | 30%                      |
| Acid concentration (wt%)                                   | 6.0%                             | 4.0%                     |
| Temperature (°C)                                           | 177                              | 150                      |
| Pressure (atm)                                             | 8.73                             | 5                        |
| Residence time (min)                                       | 15                               | 65.2                     |
| Combined severity factor                                   | 2.47                             | 2.24                     |
| <b>Reactions and conversions</b>                           |                                  |                          |
| (Mannan) <sub>n</sub> + n H <sub>2</sub> O → n Mannose     | 82.56%                           | 57.80%                   |
| (Glucan) <sub>n</sub> + n H <sub>2</sub> O → n Glucose     | 44.33%                           | 57.80%                   |
| (Xylan) <sub>n</sub> + n H <sub>2</sub> O → n Xylose       | 82.09%                           | 65.96%                   |
| (Galactan) <sub>n</sub> + n H <sub>2</sub> O → n Galactose | 86.90%                           | 100.00%                  |
| (Lignin) <sub>n</sub> → n Soluble Lignin                   | 23.62%                           | 11.36%                   |
| Hexoses → HMF + 3H <sub>2</sub> O                          | 1.90%                            | 0.80%                    |
| Pentoses → Furfural + 3H <sub>2</sub> O                    | 35.70%                           | 34.04%                   |
| <b>Blowdown tank</b>                                       |                                  |                          |
| Pressure (atm)                                             |                                  | 1.00                     |
| Temperature (°C)                                           |                                  | 102                      |
| Residence time (min)                                       |                                  | 15                       |
| <b>SMB chromatography</b>                                  |                                  |                          |
| Desorbent/feed ratio (v/v)                                 |                                  | 2 <sup>9-11</sup>        |
| Oxalic acid recovery in the raffinate                      |                                  | 97% <sup>10,12</sup>     |
| Sugars recovery in the eluate                              |                                  | 95% <sup>10,12</sup>     |

<sup>a</sup> The reactor design includes a vertical presteamer vessel, two transport conveyors, and two plug screw feeders to the horizontal screw reactor, according to a reactor design by Humbird et al.<sup>8</sup> The continuous screw reactor is sized considering the hydrolysis reaction time and a 40% filling degree<sup>13</sup>.

Table S5. Operational parameters for the mannose purification section (S-500)

| <b>Equipment and parameters</b>                             | <b>Values</b>                                                                 |
|-------------------------------------------------------------|-------------------------------------------------------------------------------|
| <b>SMB Chromatography</b>                                   |                                                                               |
| <b>Stream</b>                                               | <b>Flow ratio <sup>14</sup></b>                                               |
| Feed                                                        | 1.0                                                                           |
| Eluent (deionized water)                                    | 3.9                                                                           |
| Extract (mannose rich stream)                               | 2.9                                                                           |
| Raffinate (other sugars)                                    | 2.0                                                                           |
| <b>Component</b>                                            | <b>Split fraction in the extract <sup>14</sup></b>                            |
| Arabinose                                                   | 1.000                                                                         |
| Mannose                                                     | 0.949                                                                         |
| Xylose                                                      | 0.216                                                                         |
| Galactose                                                   | 0.103                                                                         |
| Glucose                                                     | 0.063                                                                         |
| MOS <sup>a</sup>                                            | 0.003                                                                         |
| <b>Multi-effect Evaporator</b>                              | 1 <sup>st</sup> / 2 <sup>nd</sup> / 3 <sup>rd</sup> / 4 <sup>th</sup> effects |
| Temperature (°C)                                            | 104 / 92 / 80 / 68                                                            |
| Pressure (atm)                                              | 1.15 / 0.739 / 0.459 / 0.225                                                  |
| Heat transfer coefficients (kW/m <sup>2</sup> °C)           | 2.56 / 1.86 / 1.395 / 0.815                                                   |
| <b>Crystallizer</b>                                         |                                                                               |
| Temperature (°C)                                            | 25                                                                            |
| Residence time (h)                                          | 12                                                                            |
| Ethanol concentration (%wt)                                 | 70%                                                                           |
| <b>Mannose solubility data in 80% ethanol <sup>15</sup></b> |                                                                               |
| <b>T (°C)</b>                                               | <b>C (g/L)</b>                                                                |
| 5.05                                                        | 183.75                                                                        |
| 15.05                                                       | 198.84                                                                        |
| 25.05                                                       | 210.56                                                                        |

<sup>a</sup> based on separation yields reported for galacto- and fructo-oligosaccharides<sup>16,17</sup>

Table S6. Operational parameters for the MOS purification section (S-600)

| <b>Equipment and parameters</b>                   | <b>Values</b>                                                                 |
|---------------------------------------------------|-------------------------------------------------------------------------------|
| <b>Multi-effect Evaporator</b>                    | 1 <sup>st</sup> / 2 <sup>nd</sup> / 3 <sup>rd</sup> / 4 <sup>th</sup> effects |
| Temperature (°C)                                  | 110 / 97 / 81 / 52                                                            |
| Pressure (atm)                                    | 1.409 / 0.893 / 0.482 / 0.1                                                   |
| Heat transfer coefficients (kW/m <sup>2</sup> °C) | 2.56 / 1.86 / 1.395 / 0.815                                                   |
| <b>Activated carbon (AC) columns</b>              |                                                                               |
| HMF and furfural removal efficiency               | 95% <sup>18,19</sup>                                                          |
| Sugars loss                                       | 5% <sup>18,19</sup>                                                           |
| Water wash volume (BV)                            | 1                                                                             |
| Ethanol volume (BV)                               | 1                                                                             |
| <b>Sizing parameters</b>                          |                                                                               |
| Adsorption capacity (mg HMF/g AC)                 | 300 <sup>20</sup>                                                             |
| AC density (kg/m <sup>3</sup> )                   | 400 <sup>21</sup>                                                             |
| Equipment oversize factor                         | 2                                                                             |
| Bed to column height ratio                        | 0.5                                                                           |
| H/D ratio                                         | 3                                                                             |

Table S7. Operational parameters for the combustion section (S-700)

| <b>Equipment and parameters</b>                     | <b>Values</b> |
|-----------------------------------------------------|---------------|
| <b>Boiler</b>                                       |               |
| Outlet temperature (°C)                             | 1050          |
| Excess air for combustion (%)                       | 10%           |
| <b>Steam turbine</b>                                |               |
| Adiabatic efficiency (%)                            | 90%           |
| <b>Alternative 1: single pressure Rankine cycle</b> |               |
| Inlet temperature (°C)                              | 560           |
| Inlet pressure (atm)                                | 27.34         |
| Outlet pressure (atm)                               | 0.095         |
| <b>Alternative 2: dual pressure Rankine cycle</b>   |               |
| Live steam temperature (°C)                         | 540           |
| Live steam pressure (atm)                           | 70.00         |
| Exhaust steam pressure (atm)                        | 19.74         |
| Outlet pressure (atm)                               | 0.095         |

Table S8. Operational parameters for the cold utilities section (S-800)

| Equipment and parameters            | Values |
|-------------------------------------|--------|
| <b>Cooling tower</b>                |        |
| Air humidity                        | 80%    |
| Air temperature (°C)                | 28     |
| Inlet water temperature (°C)        | 43     |
| Cooling water temperature (°C)      | 35     |
| <b>Propane Chiller</b>              |        |
| Inlet water temperature (°C)        | 25     |
| Chilled water temperature (°C)      | 15     |
| Propane pressure (atm)              | 6.22   |
| Compressor discharge pressure (atm) | 16.2   |
| Compressor isentropic efficiency    | 80%    |

## 2. Statistical models for dilute-oxalic acid hydrolysis of açai seeds

The second order models obtained for mannose yield ( $Y_{1/0}$ ), mannan conversion ( $\chi_1$ ), and mass loss ( $\delta_1$ ) are given in Equations 1–3.

$$\hat{Y}_{1/0} = 0.5106 + 0.2370 c_1 - 0.0481 c_1^2 + 0.0645 c_2 + 0.0442 c_3 - 0.0520 c_1 c_3 \quad (1)$$

$$\hat{\chi}_1 = 0.5359 + 0.2964 c_1 + 0.0597 c_1^2 + 0.0755 c_2 + 0.0453 c_3 \quad (2)$$

$$\hat{\delta}_1 = 0.4343 + 0.2002 c_1 + 0.0299 c_1^2 + 0.0429 c_2 + 0.0361 c_3 \quad (3)$$

where  $c_1$ ,  $c_2$ , and  $c_3$  represent the dimensionless coded values of temperature, acid concentration, and time, respectively. Coded values are obtained from their original variables by subtracting the central value and dividing the result by the spacing between the central and high levels of each factor ( $c_1=(x_1-150)/20$ ,  $c_2=(x_2-4.0)/1.5$ , and  $c_3=(x_3-40)/15$ ).

Table S9 shows the analyses of variance (ANOVA) of the fitted models, which were significant with p-value < 0.0001 and showed excellent correlation with the experimental data ( $R^2 > 90\%$ ). The p-value for lack of fit of the mannose yield model does not affect the model validity as it can be considered a result of a very small deviation in the central points, which led to a low value of pure error and thus a significant p-value in the F-test.

Table S9. Analysis of variance of the adjusted models for mannose yield, mannan conversion, and mass loss for oxalic acid hydrolysis of açai seeds

| Variation source                          | Sum of squares | Degrees of freedom | Mean square | F <sub>calc</sub> | p-value  |
|-------------------------------------------|----------------|--------------------|-------------|-------------------|----------|
| <b><i>Mannose yield</i></b> ( $Y_{1/0}$ ) |                |                    |             |                   |          |
| Regression                                | 8869.1         | 5                  | 1773.8      | 20.3              | 0.00003  |
| Residuals                                 | 961.0          | 11                 | 87.4        |                   |          |
| Lack of Fit                               | 957.9          | 9                  | 106.4       | 68.8              | 0.01441  |
| Pure Error                                | 3.1            | 2                  | 1.5         |                   |          |
| Total                                     | 9830.1         | 16                 |             |                   |          |
| R <sup>2</sup>                            | 90.22%         |                    |             |                   |          |
| <b><i>Mannan conversion</i></b> ( $X_1$ ) |                |                    |             |                   |          |
| Regression                                | 12018.3        | 4                  | 3004.6      | 101.6             | 3.80E-09 |
| Residuals                                 | 354.9          | 12                 | 29.6        |                   |          |
| Lack of Fit                               | 336.7          | 10                 | 33.7        | 3.7               | 0.23130  |
| Pure Error                                | 18.2           | 2                  | 9.1         |                   |          |
| Total                                     | 12373.2        | 16                 |             |                   |          |
| R <sup>2</sup>                            | 97.13%         |                    |             |                   |          |
| <b><i>Mass loss</i></b> ( $\delta_1$ )    |                |                    |             |                   |          |
| Regression                                | 5430.4         | 4                  | 1357.6      | 120.8             | 1.39E-09 |
| Residuals                                 | 134.8          | 12                 | 11.2        |                   |          |
| Lack of Fit                               | 130.0          | 10                 | 13.0        | 5.4               | 0.165888 |
| Pure Error                                | 4.8            | 2                  | 2.4         |                   |          |
| Total                                     | 5565.3         | 16                 |             |                   |          |
| R <sup>2</sup>                            | 97.58%         |                    |             |                   |          |



### 3. Additional data

Figure S1 presents the experimental pH values of oxalic acid solutions employed for açai seeds hydrolysis, which were used to calculate the CSF of each hydrolysis condition. The final pH values of açai seeds' hydrolysates are also shown, revealing that pH variations throughout the hydrolysis reactions were not significant. In addition, theoretical pH values of oxalic acid and sulfuric acid solutions are included for comparison. Theoretical pH values were calculated from the acids' dissociation constants:  $k_{a1} = 5.370 \cdot 10^{-2}$  and  $k_{a2} = 5.248 \cdot 10^{-5}$  for oxalic acid, corresponding to  $pK_{a1} = 1.27$  and  $pK_{a2} = 4.28$  at 25 °C;<sup>22</sup> and  $k_{a2} = 1.02 \cdot 10^{-2}$  for sulfuric acid,<sup>23</sup> corresponding to  $pK_{a2} = 1.99$ . The differences between theoretical and experimental values for oxalic acid solutions may be attributed to low measurement accuracy in low pH ranges.

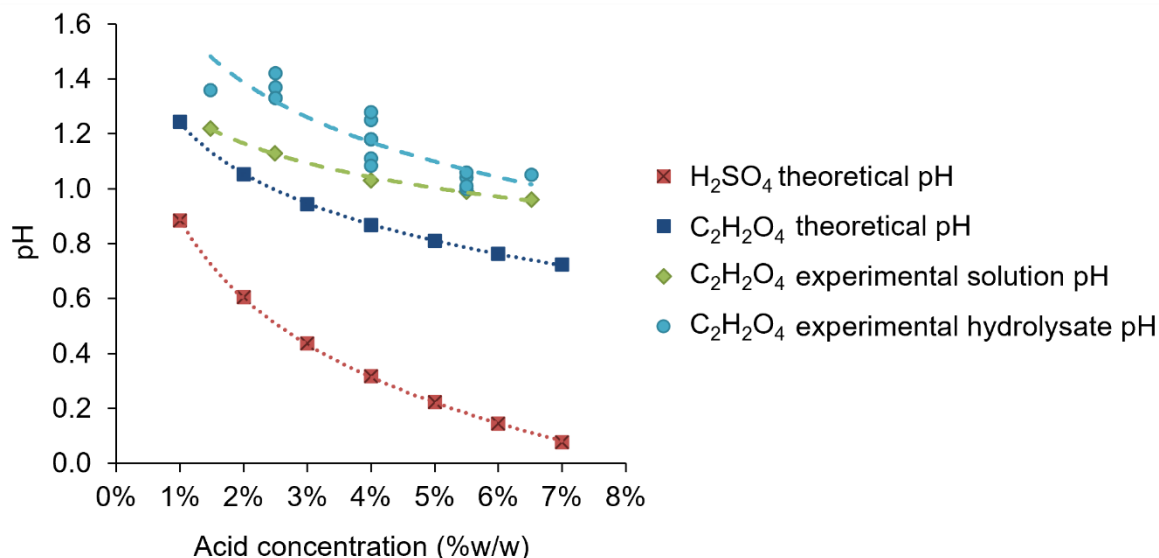

Figure S1. Theoretical and experimental pH values of oxalic acid solutions at different concentrations and experimental pH values of açai seeds hydrolysates after dilute oxalic acid hydrolysis. Theoretical pH values for sulfuric acid solutions are also shown for comparison.

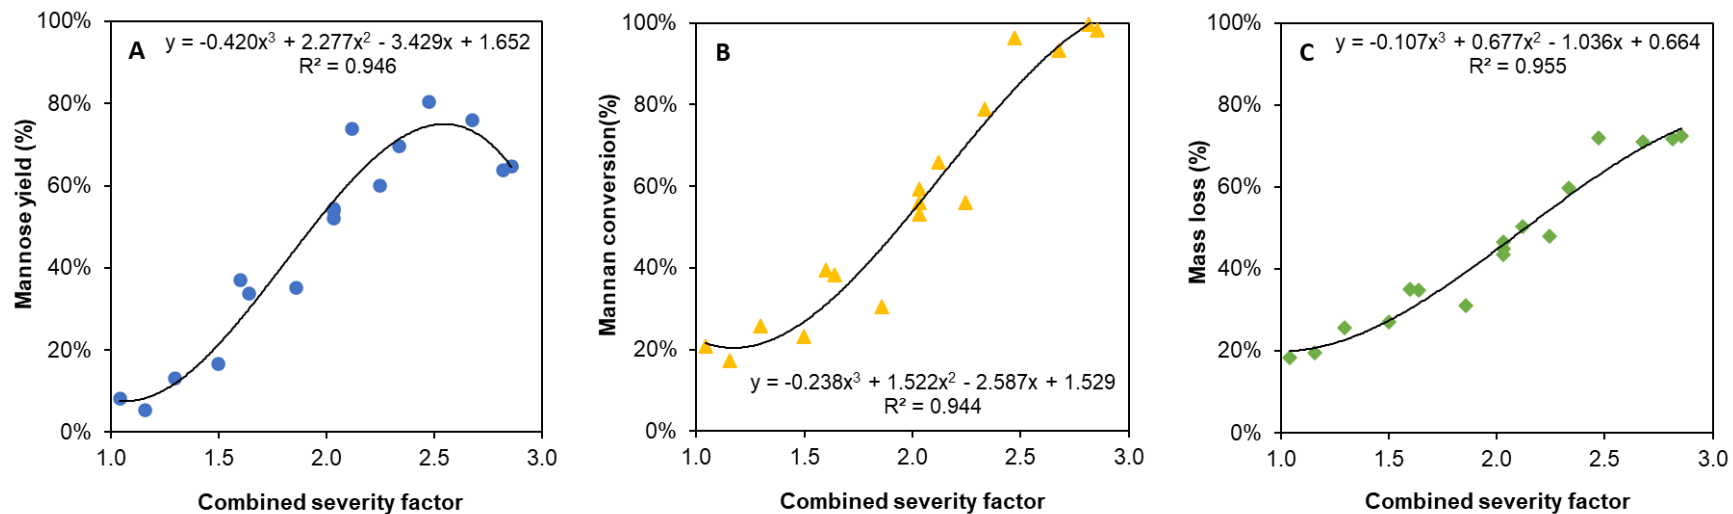

Figure S2. Correlations between the combined severity factor and response variables of dilute-oxalic acid hydrolysis of açai seeds optimization: a) mannose yield, b) mannan conversion, c) mass loss.

## References

- 1 M. K. D. Rambo, F. L. Schmidt and M. M. C. Ferreira, *Talanta*, 2015, **144**, 696–703.
- 2 A. F. Monteiro, I. S. Miguez, J. P. R. B. Silva and A. S. da Silva, *Sci. Rep.*, 2019, **9**, 1–12.
- 3 M. Luczynski, MSc thesis, Universidade Federal do Pará, 2008.
- 4 L. Bufalino, A. A. Guimarães, B. M. D. S. E. Silva, R. L. F. de Souza, I. C. N. A. de Melo, D. N. P. S. de Oliveira and P. F. Trugilho, *J. Renew. Sustain. Energy*, 2018, **10**, 053102.
- 5 D. A. R. de Castro, Universidade Federal do Pará, 2019.
- 6 G. Saravacos and A. E. Kostaropoulos, *Handbook of Food Processing Equipment*, Springer International Publishing AG Switzerland, Athens, Greece, Second Edi., 2016.
- 7 K. L. Kenney, K. G. Cafferty, J. J. Jacobson, I. J. Bonner, G. L. Gresham, J. R. Hess, L. P. Orvard, W. A. Smith, D. N. Thompson, V. S. Thompson, J. S. Tumuluru and N. Yancey, *Feedstock Supply System Design and Economics for Conversion of Lignocellulosic Biomass to Hydrocarbon Fuels. Conversion Pathway: Biological Conversion of Sugars to Hydrocarbons*, Idaho Falls, Idaho, 2013.
- 8 D. Humbird, R. Davis, L. Tao, C. Kinchin, D. Hsu, A. Aden, P. Schoen, J. Lukas, B. Olthof, M. Worley, D. Sexton and D. Dudgeon, *Process Design and Economics for Biochemical Conversion of Lignocellulosic Biomass to Ethanol: Dilute-Acid Pretreatment and Enzymatic Hydrolysis of Corn Stover*, Golden, CO, 2011.
- 9 Y. Xie, D. Phelps, C. H. Lee, M. Sedlak, N. Ho and N. H. L. Wang, *Ind. Eng. Chem. Res.*, 2005, **44**, 6816–6823.
- 10 W. A. Farone, J. E. Cuzens, US Pat., 5820687A, 1998.
- 11 G. Lodi, G. Storti, L. A. Pellegrini and M. Morbidelli, *Ind. Eng. Chem. Res.*, 2017, **56**, 1621–1632.
- 12 R. D. Hester, G. E. Farina, S. Nangueri, US Pat., 5407580A, 1995.
- 13 H. A. Ruiz, M. Conrad, S.-N. Sun, A. Sanchez, G. J. M. Rocha, A. Romaní, E. Castro, A. Torres, R. M. Rodríguez-Jasso, L. P. Andrade, I. Smirnova, R.-C. Sun and A. S. Meyer, *Bioresour. Technol.*, 2020, **299**, 122685.
- 14 A. R. Oroskar, N. S. Sudharsan, P. A. Oroskar, O. M. Kulkarni, US Pat., 9163050B2, 2015.
- 15 X. Gong, C. Wang, L. Zhang and H. Qu, *J. Chem. Eng. Data*, 2012, **57**, 3264–3269.
- 16 I. Mueller, A. Seidel-Morgenstern and C. Hamel, *Sep. Purif. Technol.*, 2021, **271**, 1–11.
- 17 K. Vaňková and M. Polakovič, *Chem. Eng. Technol.*, 2012, **35**, 161–168.
- 18 Z. Lin, J. Wang, V. Nikolakis and M. Ierapetritou, *Comput. Chem. Eng.*, 2017, **102**, 258–267.
- 19 T. Sainio, I. Turku and J. Heinonen, *Bioresour. Technol.*, 2011, **102**, 6048–6057.
- 20 P. Vinke and H. van Bekkum, *Starch - Stärke*, 1992, **44**, 90–96.
- 21 R. H. Perry and D. W. Green, *Perry's Chemical Engineers' Handbook*, 1997.
- 22 H. Kayser, F. Rodríguez-Ropero, W. Leitner, M. Fioroni and P. D. de María, *RSC Adv.*,

2013, **3**, 9273–9278.

23 H. Sippola and P. Taskinen, *J. Chem. Eng. Data*, 2014, **59**, 2389–2407.
